# Supplementary material
Source: PubMed Central journal article supplement (PMC3773806)
Supplement: 1307337110_pnas.201307337SI.pdf [file 1307337110_pnas.201307337SI.pdf]

# Supporting Information

Giri et al. 10.1073/pnas.1307337110

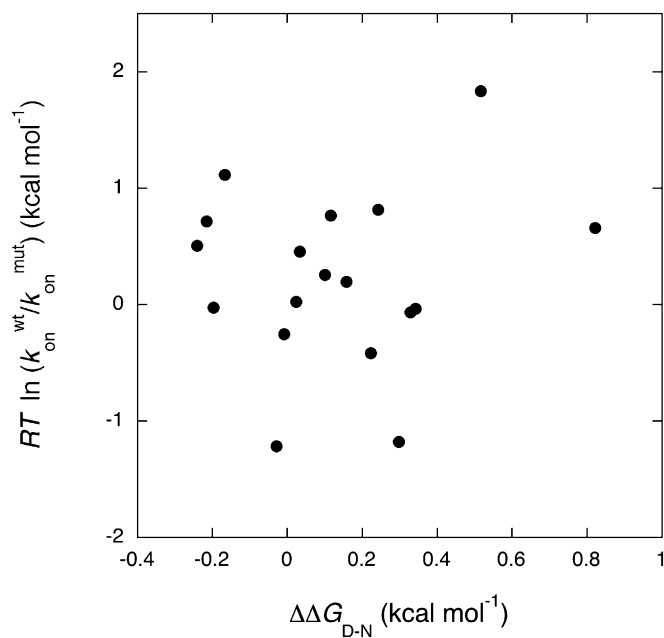

**Fig. S1.** Correlation between the observed binding rate constants and the stability of c-Myb. The stabilities of the different mutants were measured by performing standard titrations, using 1,2,3-trifluoro-ethanol. All variants displayed a single cooperative transition. A plot of the observed changes in activation binding free energy versus protein stability confirms the lack of correlation between the two variables.
